# Supplementary material
Source: publisher figshare collection journal article supplement (https://acs.figshare.com/ndownloader/files/4094158)
Supplement: Supplementary file 1 [file 4094158]

*Supporting Information for*

**Diffusion-Viscosity Decoupling in Solute Rotation and Solvent Relaxation of Coumarin153 in Ionic Liquids Containing Fluoroalkylphosphate (FAP) Anion: A thermophysical and photophysical study**

**Sudhir Kumar Das, Prabhat Kumar Sahu and Moloy Sarkar\***

School of Chemical Sciences

National Institute of Science Education and Research

Bhubaneswar 751005, India

**TABLE S1: Experimental dynamic viscosity ( $\eta$ ) and density for [MOEMPL][FAP] and [MOEMMO][FAP] as a function of temperature**

| Temp.(K) | $\eta/\text{cP}$ |               | $\rho/\text{gm cm}^{-3}$ |               |
|----------|------------------|---------------|--------------------------|---------------|
|          | [MOEMPL][FAP]    | [MOEMMO][FAP] | [MOEMPL][FAP]            | [MOEMMO][FAP] |
| 293      | 128              | 1004          | 1.634230                 | 1.680979      |
| 298      | 98               | 657           | 1.628792                 | 1.675603      |
| 303      | 75               | 438           | 1.623288                 | 1.670098      |
| 308      | 57               | 301           | 1.617759                 | 1.664575      |
| 313      | 46               | 214           | 1.612191                 | 1.659044      |
| 318      | 37               | 154           | 1.606593                 | 1.653693      |
| 323      | 30               | 114           | 1.600976                 | 1.648369      |

Experimental errors are  $\pm 5\%$

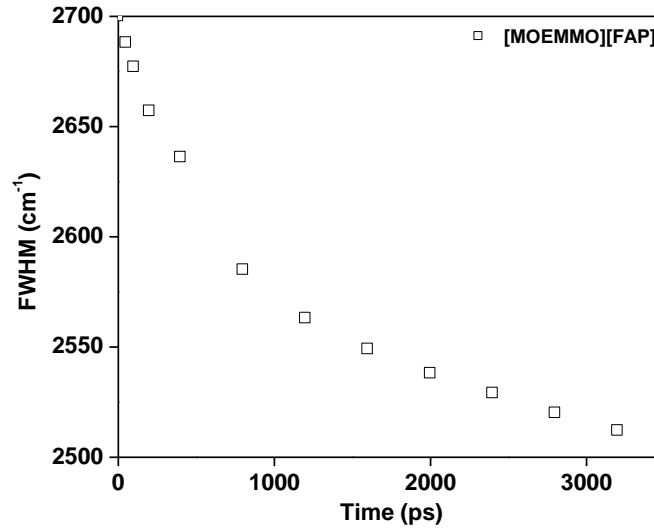

Figure S1: Plot of full width half maxima (FWHM), obtained from several time resolved emission spectra of C153 in [MOEMMO][FAP] at 293K at  $\lambda_{\text{exc.}}=405$  nm.

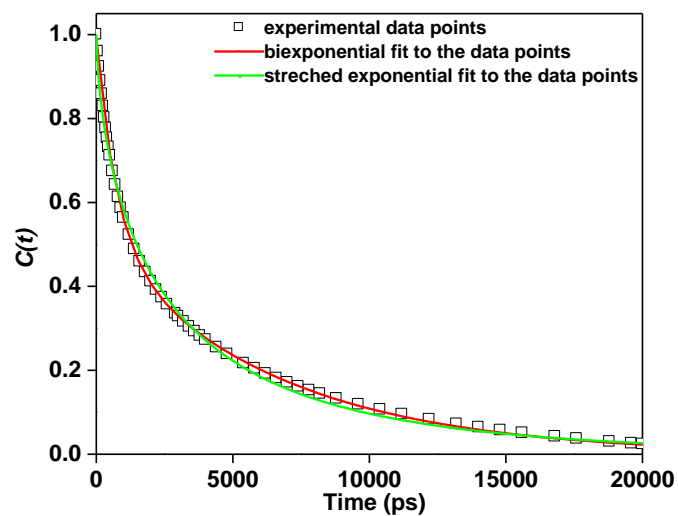

**Figure S2.** Biexponential and stretched exponential fits to spectral correlation function,  $C(t)$  versus time plot of C153 in [MOEMMO][FAP] at 293 K at  $\lambda_{\text{ex}} = 405$  nm. Symbols are denoting the data points and solid lines represent the corresponding fit to the data points.
